# Supplementary material
Source: HighWire-hosted journal article supplement (http://www.cmaj.ca/highwire/filestream/77129/field_highwire_adjunct_files/0/200722-res-1-at.pdf)
Supplement: 200722-res-1-at.pdf [file 200722-res-1-at.pdf]

## **Appendix 1 (as supplied by the authors): Protocol for development of the cohort**

Patients are first identified on presentation to an emergency department (NACRS record) with an ICD-10-CA code consistent with a firearm injury: Assault: X93, X94, X95.08, X95.09; Self-harm: X72, X73, X74.08, X74.09; Unintentional: W32, W33, W34.08, W34.09; Undetermined intent: Y22, Y23, Y24.08, Y24.09. In those patients that were admitted to hospital, ICD-10-CA codes from their DAD record were preferentially used. NACRS and DAD records only capture patients that survived to reach hospital.
